# Supplementary material
Source: Springer Nature journal article supplement (https://www.springermedizin.de/resource/supplementary/12985_2008_509_MOESM2_ESM.pdf/9607908)
Supplement: MOESM2 [file 9607908]

Additional file 2

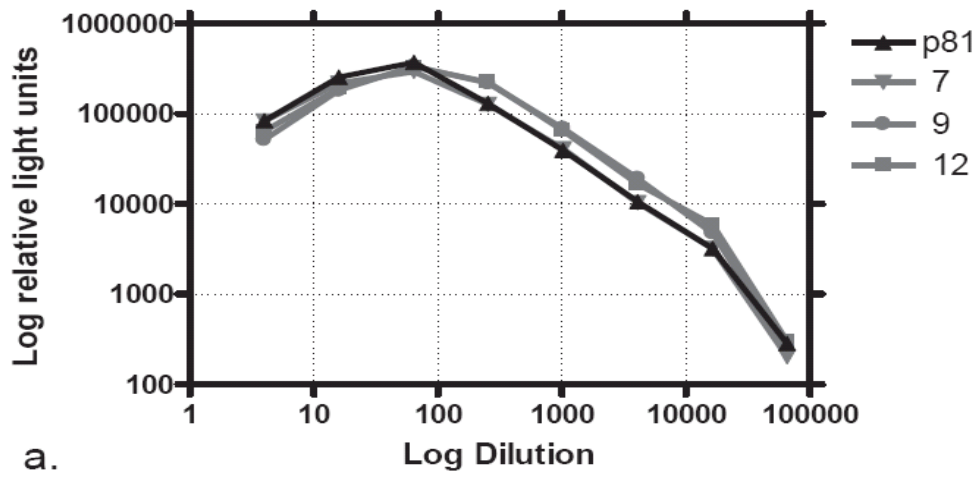

a.

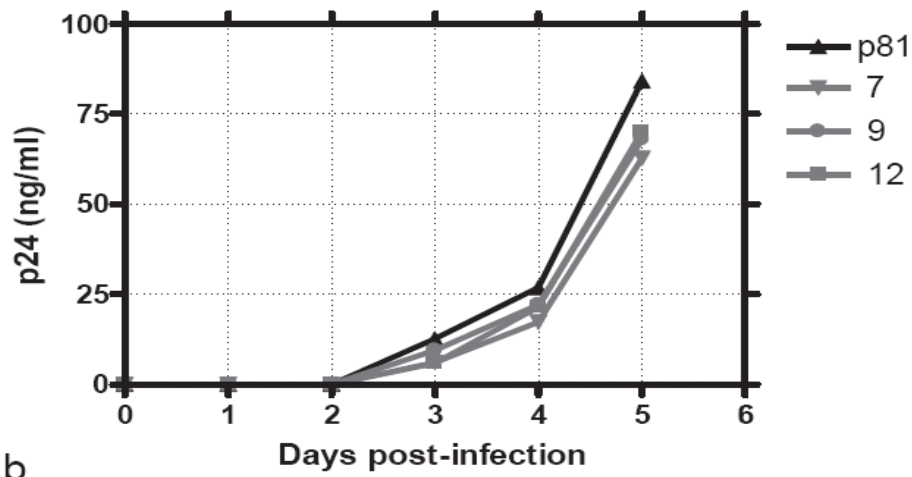

b.
